# Supplementary material for: Phosphorylation of RCC1 on Serine 11 Facilitates G1/S Transition in HPV E7-Expressing Cells
Source: MDPI journal article supplement (doi:10.3390/biom11070995), 2021-07-06
Supplement: s1 [file s1]

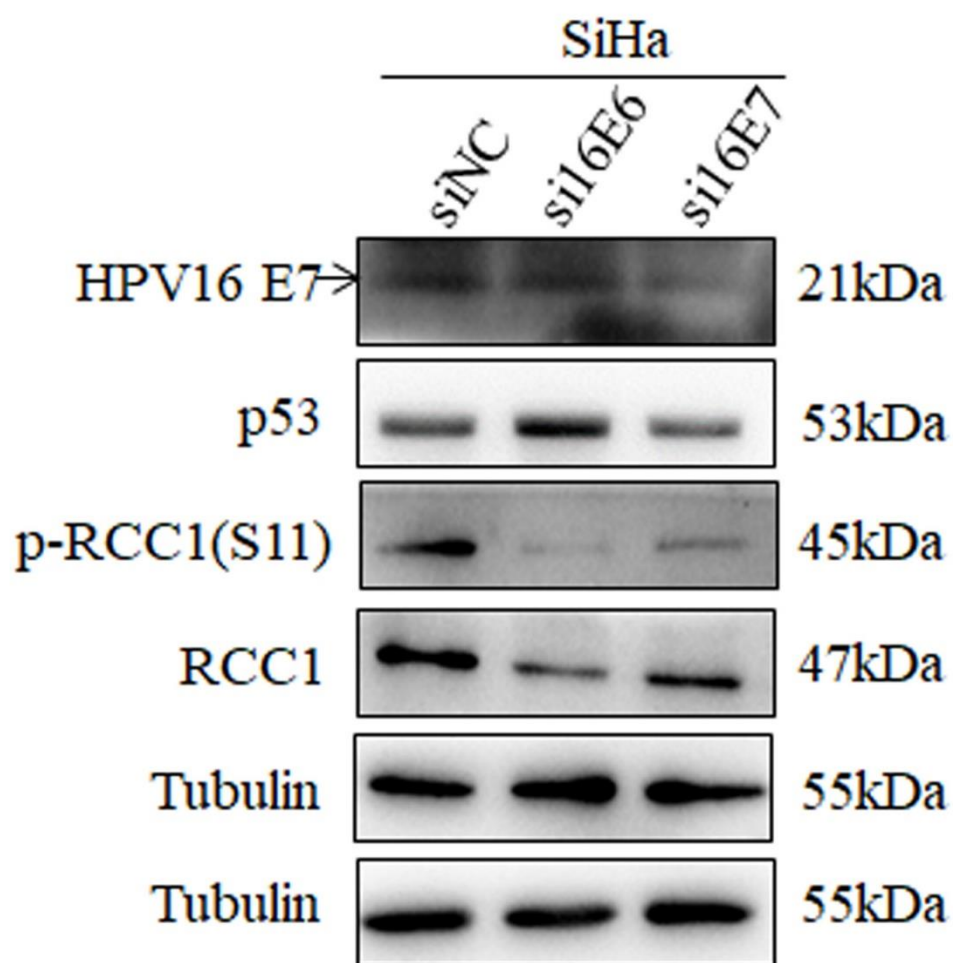

Figure S1: The protein levels of HPV16 E7, p53, p-RCC1(S11), RCC1 were detected by Western blot following transfection with siRNAs targeting HPV16 E6 or E7.
